# Supplementary material for: Excellence in Heart Failure: A Multidisciplinary Program on Heart Failure Management for Improved Patient Outcome
Source: MDPI journal article supplement (doi:10.3390/hearts5010001), 2023-12-21
Supplement: s1 [file s1]

## Supplementary Material

Supplementary materials to this manuscript include patient's HF etiology (Table S1) at study baseline, a complete list of medication used under the scope of the program (Table S2), and a correlation analysis between relative differences in EF values and other variables of interest (Figure S1).

**Table S1.** Patients' HF etiology at baseline.

| <b>Etiology</b>                          | <b><i>n</i></b> | <b>%</b> |
|------------------------------------------|-----------------|----------|
| Non-Ischemic Dilated Cardiomyopathy      | 19              | 35.2%    |
| Ischemic Cardiomyopathy                  | 12              | 22.2%    |
| Cardiotoxicity (alcohol)                 | 6               | 11.1%    |
| Dilated Cardiomyopathy in study          | 3               | 5.6%     |
| Myocarditis                              | 3               | 5.6%     |
| Cardiotoxicity (anthracyclines)          | 2               | 3.7%     |
| Valvular Disease                         | 2               | 3.7%     |
| Tachycardiomyopathy                      | 2               | 3.7%     |
| Non-compacted Cardiomyopathy             | 1               | 1.9%     |
| Peri-partum Cardiomyopathy               | 1               | 1.9%     |
| Hypertensive heart disease               | 1               | 1.9%     |
| Infiltrative heart disease (amyloidosis) | 1               | 1.9%     |
| Neuromuscular disease                    | 1               | 1.9%     |

**Table S2.** Distribution of the prescribed medication and implanted devices among patients.

| <b>Medication</b>                                                     | <b><i>n</i></b> | <b>% (out of 54)</b> |
|-----------------------------------------------------------------------|-----------------|----------------------|
| <b><u>No medication</u></b>                                           | <b>1</b>        | <b>1.9</b>           |
| <b><u>1 Drug</u></b>                                                  | <b>2</b>        | <b>3.7</b>           |
| BB ( <i>no target</i> )                                               | 1               | 1.9                  |
| MRA ( <i>target</i> )                                                 | 1               | 1.9                  |
| <b><u>2 Drugs</u></b>                                                 | <b>12</b>       | <b>22.2</b>          |
| BB + ARB                                                              | 5               | 9.3                  |
| Target                                                                | 4               | 7.4                  |
| No target                                                             | 1               | 1.9                  |
| BB + ACEi/ARB ( <i>target</i> )                                       | 3               | 5.6                  |
| BB + MRA                                                              | 2               | 3.7                  |
| Target                                                                | 1               | 1.9                  |
| No target                                                             | 1               | 1.9                  |
| ACEi/ARB + MRA ( <i>no target</i> )                                   | 1               | 1.9                  |
| ARNI + MRA ( <i>no target</i> )                                       | 1               | 1.9                  |
| <b><u>3 Drugs</u></b>                                                 | <b>39</b>       | <b>72.2</b>          |
| BB + ARNI + MRA                                                       | 15              | 27.8                 |
| BB ( <i>target</i> ) + ARNI ( <i>target</i> ) + MRA ( <i>target</i> ) | 1               | 1.9                  |
| BB ( <i>target</i> ) + ARNI + MRA                                     | 1               | 1.9                  |
| BB + ARNI ( <i>target</i> ) + MRA                                     | 4               | 7.4                  |
| BB + ARNI ( <i>target</i> ) + MRA ( <i>target</i> )                   | 1               | 1.9                  |
| BB + ARNI + MRA ( <i>all no target</i> )                              | 7               | 13.0                 |
| BB + ARNI + MRA ( <i>target</i> )                                     | 1               | 1.9                  |
| BB + ACEi/ARB + MRA                                                   | 24              | 44.4                 |
| BB ( <i>target</i> ) + ACEi/ARB ( <i>target</i> ) + MRA               | 1               | 1.9                  |
| BB ( <i>target</i> ) + ACEi/ARB + MRA ( <i>target</i> )               | 1               | 1.9                  |
| BB + ACEi/ARB ( <i>target</i> ) + MRA                                 | 4               | 7.4                  |
| BB + ACEi/ARB + MRA ( <i>all no target</i> )                          | 16              | 29.6                 |

|                                       |          |                      |
|---------------------------------------|----------|----------------------|
| BB + ACEi/ARB + MRA ( <i>target</i> ) | 2        | 3.7                  |
| <b>Implanted devices</b>              | <b>n</b> | <b>% (out of 54)</b> |
| None                                  | 33       | 61.1%                |
| ICD (1 <sup>st</sup> prevention)      | 7        | 13.0%                |
| ICD (2 <sup>nd</sup> prevention)      | 3        | 5.6%                 |
| CRT-P                                 | 4        | 7.4%                 |
| CRT-D (1 <sup>st</sup> prevention)    | 7        | 13%                  |

ACEi = angiotensin-converting enzyme inhibitors; ARB = angiotensin receptor blockers; ARNI = angiotensin receptor - neprilysin inhibitors; BB = beta blockers; MRA = mineralcorticoid-receptor antagonists; CRT-D = implantable cardiac resynchronization therapy defibrillator; CRT-P = cardiac resynchronization therapy pacemaker; ICD = implantable cardioverter-defibrillator.

**Table S3.** Follow-up time characteristics of the patients that had EF data at follow-up (n=39).

| <b>Follow-up</b>   | <b>Months</b> |
|--------------------|---------------|
| Average            | 7.9           |
| Standard deviation | 3.3           |
| Median (IQR)       | 8 (5;11)      |
| Minimum            | 3             |
| Maximum            | 15            |

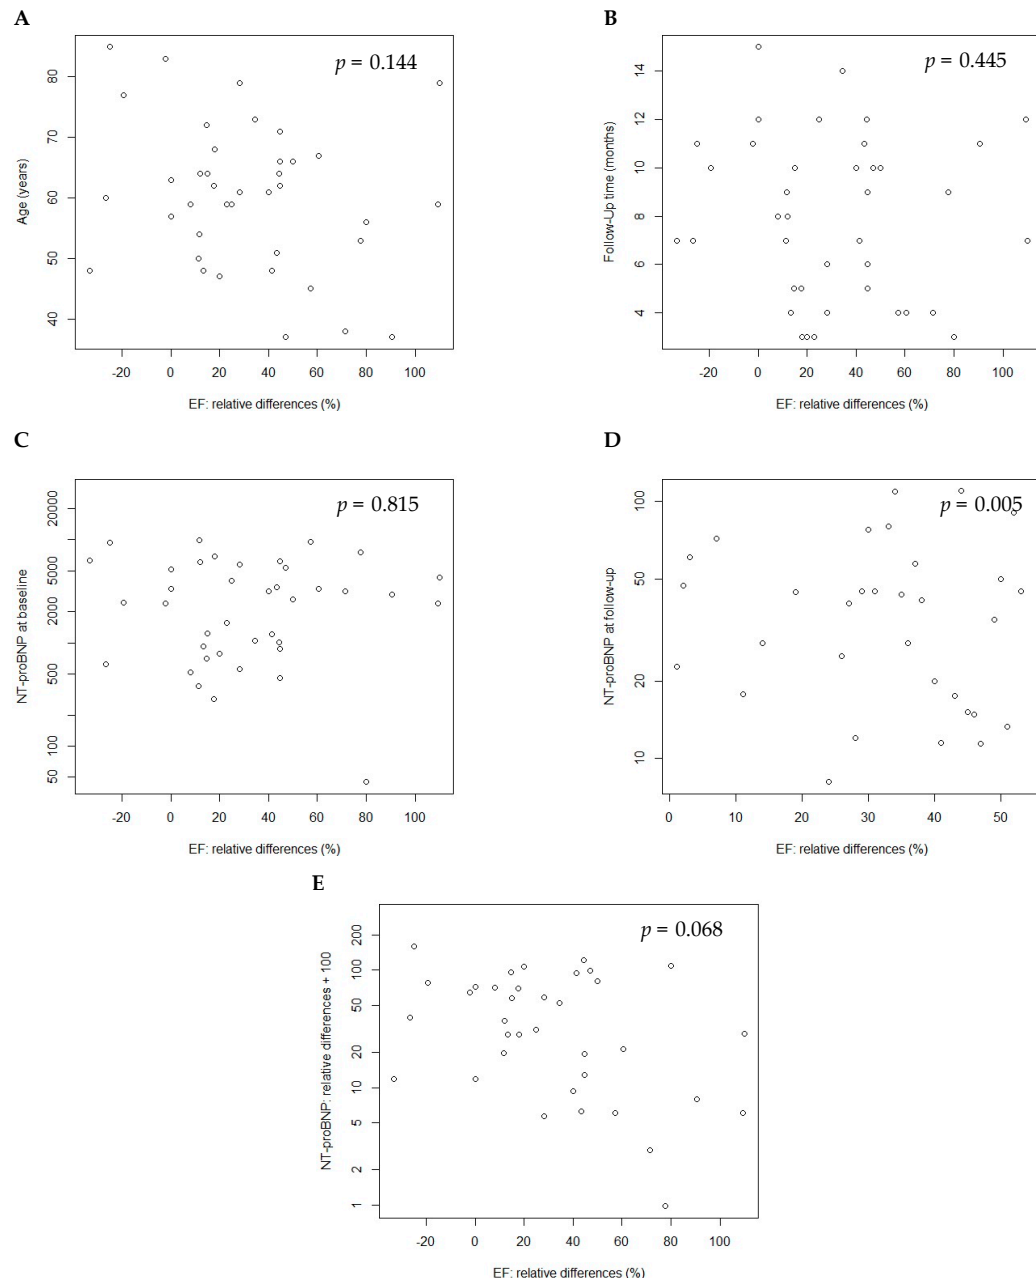

**Figure S1.** Scatterplots of the correlation analysis between relative differences in EF and other continuous variables: **A)** **B)** follow-up time, **C)** NT-proBNP values at baseline, **D)** NT-proBNP values at follow-up and **E)** relative differences in NT-proBNP values. Analyses were performed using Pearson's coefficient, and Spearman's correlation coefficient was used to assess the relationships.
